# Supplementary material for: Untargeted Lipidomics Reveal Quality Changes in High-Moisture Japonica Brown Rice at Different Storage Temperatures
Source: MDPI journal article supplement (doi:10.3390/foods12234218), 2023-11-22
Supplement: s1 [file s1]

## **Supporting Information**

**For**

### **Untargeted Lipidomics Reveals Quality Changes of High-moisture Japonica Brown Rice during Different Storage Temperatures**

Lingyu Qu, Yan Zhao\*, Xiangdong Xu, Yanfei Li, and Haoxin Lv

School of Food and Strategic Reserves, Henan University of Technology, Zhengzhou,  
450000, PR China

**Corresponding Author**

\* Prof. Yan Zhao (Y. Zhao).

Email: zhaoyanss10@126.com

Supporting information Figure. S1

Figure. S1

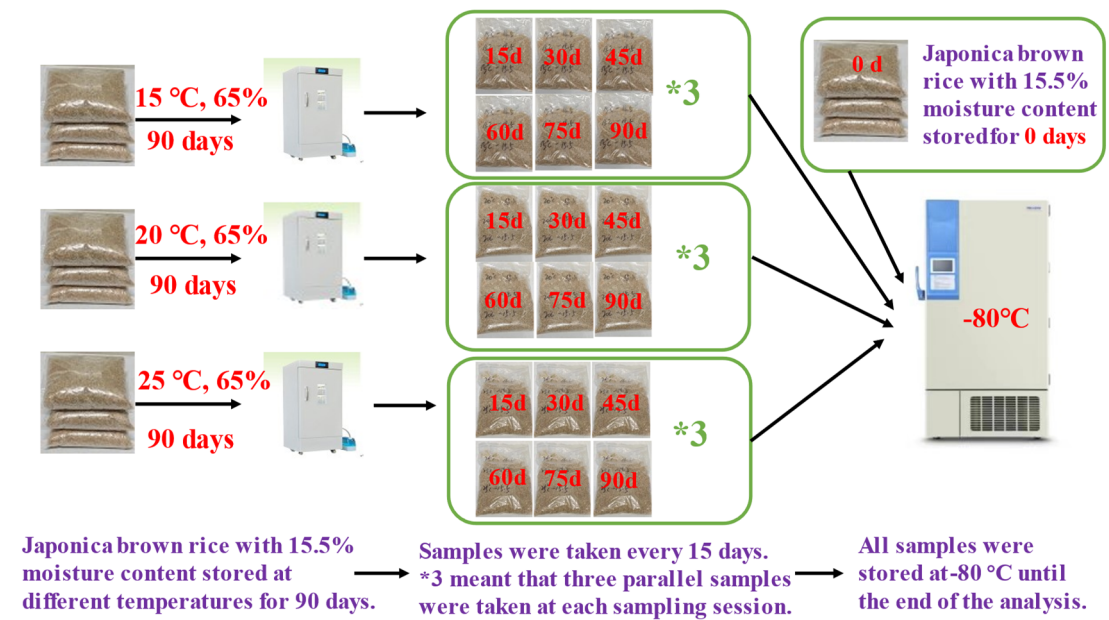

Figure. S1. The real condition of storage experimentation.
